# Supplementary material
Source: PubMed Central journal article supplement (PMC10681682)
Supplement: NIHMS1791015-supplement-1.pdf [file NIHMS1791015-supplement-1.pdf]

**HNQOL survey**

|         | <b>timepoint</b> | <b>N</b> | <b>MEAN</b> | <b>MIN</b> | <b>MAX</b> | <b>STD</b> | <b>significance level</b> | <b>p-value from mixed model</b> |
|---------|------------------|----------|-------------|------------|------------|------------|---------------------------|---------------------------------|
| Eating  | Screening        | 53       | 80.8805     | 29.16667   | 100        | 18.87842   |                           | ref                             |
|         | 6 months         | 35       | 74.80952    | 29.16667   | 100        | 18.24744   | *                         | 0.0285156                       |
|         | 12 months        | 32       | 75.13021    | 8.333333   | 100        | 22.95596   |                           | 0.0688483                       |
|         | 24 months        | 25       | 80.75       | 54.16667   | 100        | 13.99198   |                           | 0.4304148                       |
| Emotion | Screening        | 52       | 62.17949    | 12.5       | 95.83333   | 19.98853   |                           |                                 |
|         | 6 months         | 35       | 72.14286    | 16.66667   | 100        | 27.112     | ***                       | 0.000034                        |
|         | 12 months        | 33       | 75.12626    | 4.166667   | 100        | 21.98595   | ***                       | 0.0000008                       |
|         | 24 months        | 25       | 75.73333    | 16.66667   | 100        | 22.7167    | ***                       | 0.0000034                       |
| Pain    | Screening        | 53       | 62.85377    | 12.5       | 100        | 21.7688    |                           |                                 |
|         | 6 months         | 35       | 64.82143    | 6.25       | 100        | 29.12186   |                           | 0.5005594                       |
|         | 12 months        | 33       | 64.83586    | 0          | 100        | 28.621     |                           | 0.34542                         |
|         | 24 months        | 25       | 66.58333    | 12.5       | 100        | 29.63098   |                           | 0.2508016                       |
| Speech  | Screening        | 54       | 47.91667    | 18.75      | 100        | 21.82018   |                           |                                 |
|         | 6 months         | 35       | 53.5119     | 0          | 100        | 31.70732   |                           | 0.1527897                       |
|         | 12 months        | 34       | 51.47059    | 0          | 100        | 33.1455    |                           | 0.2701334                       |
|         | 24 months        | 24       | 59.375      | 0          | 100        | 23.45787   | *                         | 0.0244326                       |

**VRQOL instrument**

|  | <b>timepoint</b> | <b>N</b> | <b>MEAN</b> | <b>MIN</b> | <b>MAX</b> | <b>STD</b> | <b>significance level</b> | <b>p-value from mixed model</b> |
|--|------------------|----------|-------------|------------|------------|------------|---------------------------|---------------------------------|
|  | Screening        | 52       | 24.9615     | 10         | 49         | 9.2968     |                           |                                 |
|  | 6 months         | 33       | 23.6061     | 11         | 41         | 10.1271    |                           | 0.3887803                       |
|  | 12 months        | 29       | 24.5172     | 12         | 43         | 9.7417     |                           | 0.3401234                       |
|  | 24 months        | 22       | 23.6818     | 12         | 50         | 10.8469    |                           | 0.5548782                       |

**significance key**

- \*p<0.05
- \*\* p<0.01
- \*\*\*p<0.001
